# Supplementary material for: Differentiating Thamnocalamus Munro from Fargesia Franchet emend. Yi (Bambusoideae, Poaceae): novel evidence from morphological and neural-network analyses
Source: PubMed Central journal article supplement (PMC5482892; doi:10.1038/s41598-017-04613-9), 2017-06-23
Supplement: 41598_2017_4613_MOESM1_ESM.pdf [file 41598_2017_4613_MOESM1_ESM.pdf]

1 **Differentiating *Thamnocalamus* Munro from *Fargesia* Franchet *emend.* Yi**  
2 **(Bambusoideae, Poaceae): novel evidence from morphological and neural-**  
3 **network analyses**

4 **Shiliang Liu<sup>1, 2</sup>, Rongjie Yang<sup>1</sup>, Jun Yang<sup>1</sup>, Tongpei Yi<sup>1</sup>, Huixing Song<sup>1</sup>, Mingyan Jiang<sup>1</sup>, Durgesh K.**  
5 **Tripathi<sup>3</sup>, Mingdong Ma<sup>1</sup> & Qibing Chen<sup>1</sup>**

6 <sup>1</sup> College of Landscape Architecture, Sichuan Agricultural University, Chengdu, Sichuan, China

7 <sup>2</sup> College of Agriculture, Food and Natural Resources, University of Missouri, Columbia, MO, USA

8 <sup>3</sup> Centre for Medical Diagnostic and Research, Motilal Nehru national Institute of Technology, Allahabad,  
9 India

10  
11 Correspondence and requests for materials should be addressed to M.D. Ma (email: 610245498@qq.com) and  
12 Q.B. Chen (email: cqbc@sicau.edu.cn).

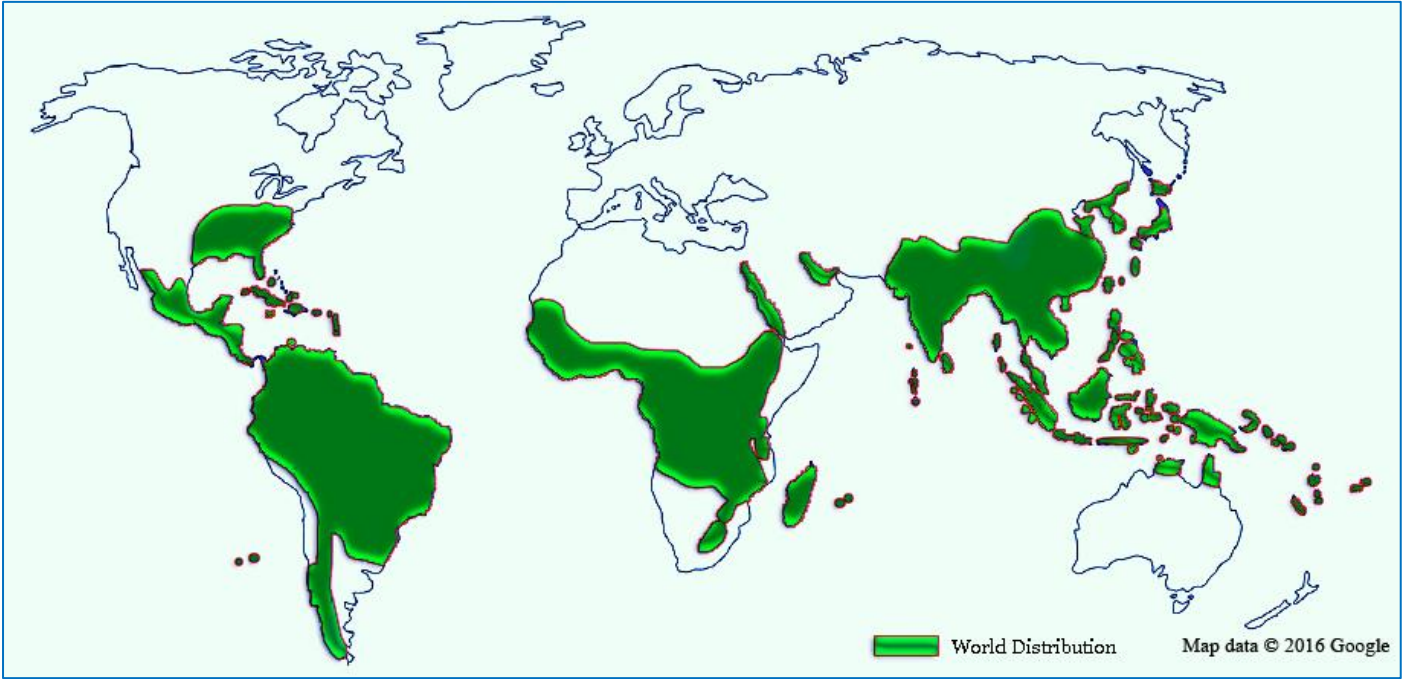

15

16 **Figure S1. World distribution of bamboo (Poaceae: Bambusoideae).** The figure was generated with  
17 Adobe® Photoshop® CS3 extend 10.0.1 software (Adobe Systems Inc., San Jose, CA, USA; URL link:  
18 <https://www.adobe.com/products/photoshop.html?promoid=KLXLS>) based on Google® maps (Google Inc.,  
19 Mountain View, CA, USA; URL link: <https://www.google.com/maps>).

20

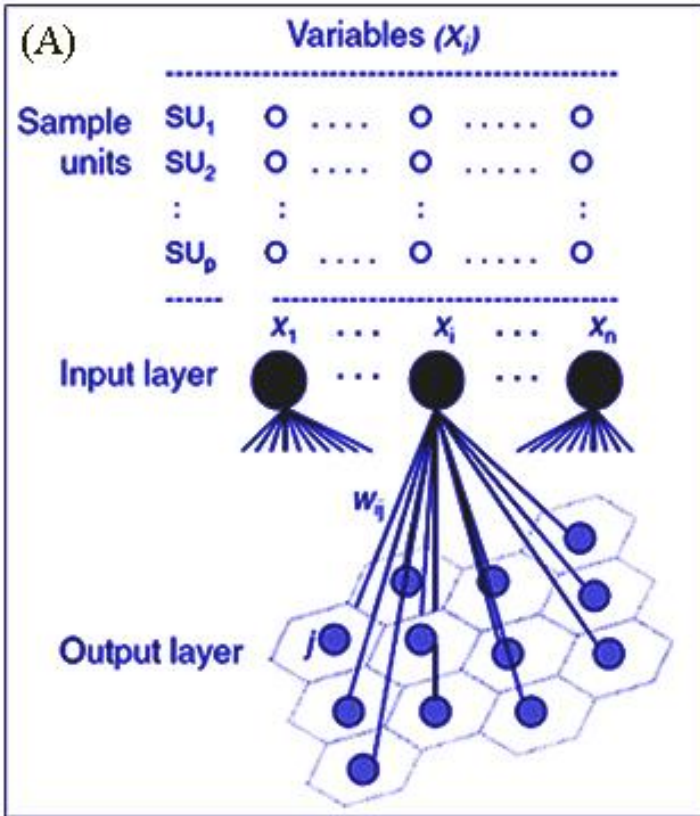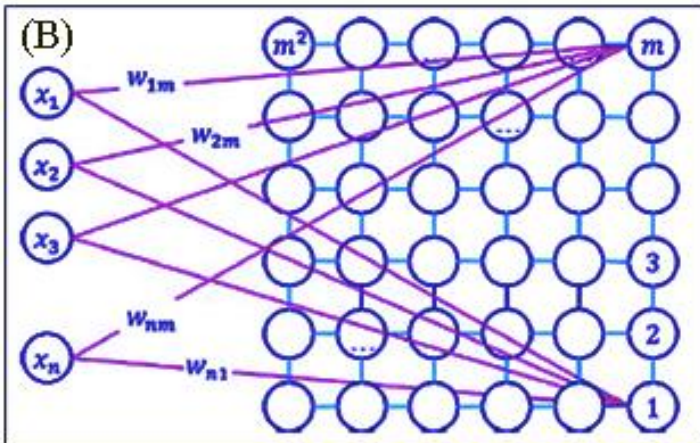

**Figure S2. Schematic diagram (A) and basic structure (B) of the SOM network.** The SOM network is an array of  $m^2$  processing neurons. If these  $m$  neurons are arranged on a grid in a plane, the network is called two-dimensional because this network maps high-dimensional input vectors onto a two-dimensional surface. For a given network, the input vector  $x$  has a fixed dimension  $n$ . The  $n$  components of the input vector  $x$  (*i.e.*,  $x_1, x_2, \dots, x_n$ ) are connected to each neuron in the array. A synaptic weight  $w_{ij}$  is defined for a connection from the  $i$ th component of the input vector to the  $j$ th neuron. Thus, an  $n$ -dimensional vector  $w_j$  of synaptic weights is associated with each neuron  $j$   $j^{1-3}$ .

**Table S1. Coding rules of 12 categories (46 characteristics) for the phylogenetic reconstruction.** ‘0’

represents the original character state, ‘1’ or ‘2’ represent the derived character state, and ‘?’ represents a missing feature. ‘1’ represents more original characteristics than ‘2’, but ‘0’ represents more original characteristics than ‘1’.

| No. | Categories     | Characteristics                       | Acronym           | Encoding rules                                                              |
|-----|----------------|---------------------------------------|-------------------|-----------------------------------------------------------------------------|
| 1   | Stem           | Type of underground stem              | TUS               | Sympodial-clumping (0); Sympodial-scattering (1)                            |
| 2   | Leaf sheath    | Number                                | LSN               | ?                                                                           |
|     |                | Length relative to inflorescences     | CPI               | Longer (0); Shorter (1); Equal (2)                                          |
|     |                | Leaf present or absent                | WOL               | Absent (0); Present (1)                                                     |
|     |                | Extent of expansion around the spathe | ES                | Not expanded (0); Expanded slightly (1); Expanded (2)                       |
| 3   | Inflorescences | Genuine or false inflorescence        | IGF               | False (0); Genuine (1)                                                      |
|     |                | Botryose or conical                   | IB/IC             | Botryose (0); Conical (1)                                                   |
|     |                | Compact or squarrose                  | IC/IS             | Compact (0); Squarrose (1)                                                  |
|     |                | Terminal or lateral                   | IL/IT             | Terminal (0); Lateral (1)                                                   |
|     |                | Bracts present or absent              | IWOB              | Absent (0); Present (1)                                                     |
|     |                | Length (mm)                           | ILG               | ?                                                                           |
|     |                | Number                                | SN                | ?                                                                           |
| 4   | Spikelet       | Length (mm)                           | SLG               | ?                                                                           |
|     |                | Number of florets                     | SFN               | ?                                                                           |
|     |                | Color of florets                      | SFC               | Light yellow green (0); Light green (1); Green (2)                          |
|     |                | Length of rachilla (mm)               | SRLG              | ?                                                                           |
|     |                | Length of pedicel (mm)                | SPLG              | ?                                                                           |
|     |                | Hairs on pedicel present or absent    | SPH               | Absent (0); Present (1)                                                     |
|     |                | Bracts at the base of pedicel         | SPB               | Absent (0); Present (1)                                                     |
| 5   |                | Glume texture                         | Glume and texture | GM                                                                          |
| 6   | First glume    | Shape                                 | FS                | Linear-lanceolate (0); Ovate-lanceolate (1); Long and narrow lanceolate (2) |
|     |                | Length (mm)                           | FLG               | ?                                                                           |
|     |                | Number of nerves                      | FNN               | ?                                                                           |
| 7   | Second glume   | Shape                                 | SS                | Linear-lanceolate (0); Ovate-lanceolate (1); Long and narrow lanceolate (2) |
|     |                | Length (mm)                           | SLG               | ?                                                                           |
|     |                | Number of nerves                      | SNN               | ?                                                                           |
| 8   | Lemma          | Shape                                 | LS                | Linear-lanceolate (0); Ovate-lanceolate (1); Long and narrow lanceolate (2) |
|     |                | Length (mm)                           | LLG               | ?                                                                           |
|     |                | Number of nerves                      | LNN               | ?                                                                           |
|     |                | Hairs present or absent               | LWOH              | Absent (0); Present (1)                                                     |
|     |                | Texture                               | LM                | Papery (0); Membranous (1)                                                  |
| 9   | Palea          | Length (cm)                           | PLG               | ?                                                                           |
|     |                | Two cristae present or absent         | PWOC              | Absent (0); Present (1)                                                     |
|     |                | Apex split into two                   | PAS               | No (0); Yes (1)                                                             |
|     |                | Hairs on cristae present or absent    | PCH               | Absent (0); Present (1)                                                     |

|    |           |                                    |      |                                             |
|----|-----------|------------------------------------|------|---------------------------------------------|
|    |           | Hairs between cristae              | PBH  | Absent (0); Present (1)                     |
| 10 | Lodicule  | Number                             | LN   | ?                                           |
|    |           | Shape                              | LS   | Lanceolate (0); Triangular (1); Ovate (2)   |
|    |           | Comparative size                   | LSSN | Equal (0); Not equal (1)                    |
|    |           | Hairs on margins present or absent | LMH  | Absent (0); Present (1)                     |
| 11 | Stamen    | Number                             | SUN  | ?                                           |
|    |           | Color of anther                    | AAC  | Yellow (0); Brownish yellow (1); Purple (2) |
| 12 | Gynoecium | Shape of ovary                     | GOS  | Elliptic (0); Ovate (1); Oblong (2)         |
|    |           | Hairs present or absent            | GWOH | Absent (0); Present (1)                     |
|    |           | Number of styles                   | GSN  | ?                                           |
|    |           | Number of stigmas                  | GSTN | ?                                           |

---

34

35

36



**Methods S1.** The SOM is a sheet like network structure, in which a squared array of output units is commonly adopted. The array of the output units is called an output or feature map<sup>4</sup>. After completing training of a SOM net, the input vectors used for training will be mapped onto different output units. If two input vectors are mapped onto the same output unit, it means that these two input vectors have similar characteristics<sup>3,5</sup>. In the work, the algorithm is as follows<sup>1,4,6</sup>:

*Step #1* Set up the map size and initialize the reference vectors  $\mathbf{m}_j$  associated with each output node to random values.

*Step #2* Present one input vector  $\mathbf{x}(t)$ .

*Step #3* Calculate the distance  $d_j$  between the input vector  $\mathbf{x}(t)$  and each output node  $j$ .

*Step #4* Select the winner output node  $j$  that is associated with the reference vector  $\mathbf{m}_j(t)$  that minimizes  $d_j$ .

*Step #5* Update reference vectors for node  $j$  and its neighborhood by the function.

*Step #6* Return to step 2 and repeat the cycle until convergence (see Figure 2).

$$\mathbf{m}_j(t + 1) = \mathbf{m}_j(t) + a(t) h_{cj}(t) [\mathbf{x}(t) - \mathbf{m}_j(t)] \quad (1)$$

Where  $a(t)$  is the learning rate and  $h_{cj}$  is a neighborhood kernel.  $a(t)$  is a decreasing function that controls the magnitude of the changes with the time [ $0 < a(t) < 1$ ]. The neighborhood kernel is a function that determines the area of effect the input vector has on the map, and it is greatest for the winner neuron  $j$ , the reference vector that is closest to the input vector, and monotonically decreases the farther away neuron  $i$  is from neuron  $j$  on the map grid.

## 62 **References**

- 63 1. Kohonen, T. Self-organized formation of topologically correct feature maps. *Biol. Cybern.* **43**, 59–69, doi:  
64 10.1007/BF00337288 (1982).
- 65 2. Céréghino, R., Santoul, F., Compin, A., & Mastrorillo, S. Using self-organizing maps to investigate spatial  
66 patterns of non-native species. *Biol. Conserv.* **125**, 459–465, doi:10.1016/j.biocon.2005.04.018 (2005).
- 67 3. Ghaseminezhad, M.H., & Karami, A. A novel self-organizing map (SOM) neural network for discrete  
68 groups of data clustering. *Appl. Soft Comput.* **11**, 3771–3778, doi: 10.1016/j.asoc.2011.02.009 (2011).
- 69 4. Vesanto, J. SOM-based data visualization methods. *Intelligent Data Anal.* **3**, 111–126, doi: 10.3233/IDA-  
70 1999-3203 (1999).
- 71 5. Kandel, E.R., Schwartz, J.H., & Jessell, T.M. *Principles of Neural Science*, 4th ed., The University of  
72 Chicago Press, Chicago, IL, 231–232 (2000).
- 73 6. Kohonen, T. Essentials of the self-organizing map. *Neural Networks* **37**, 52–65, doi:  
74 10.1016/j.neunet.2012.09.018 (2013).
